# Supplementary material for: Tandem repeats structure of gel-forming mucin domains could be revealed by SMRT sequencing data
Source: Research Square preprint supplement (doi:10.21203/rs.3.rs-112828/v2), 2021-10-13
Supplement: Supplementary file 1 [file 493b6fa1bfe9a8553af8dea4.pdf]

| Number of nucleotides in pipeline consensus of HX1 |     |      |      |
|----------------------------------------------------|-----|------|------|
| A                                                  | T   | C    | G    |
| 2304                                               | 364 | 3623 | 1100 |
| Number of nucleotides in real HX1 after adjustment |     |      |      |
| A                                                  | T   | C    | G    |
| 2228                                               | 364 | 3640 | 1101 |
